# Supplementary material for: Coinage metal complexes of 2-diphenylphosphino-3-methylindole
Source: Royal Society of Chemistry journal article supplement (doi:10.1039/c1dt10564g), 2011-01-01
Supplement: c1dt10564g.pdf [file c1dt10564g.pdf]

## Supporting Information

### Coinage metal complexes of 2-diphenylphosphino-3-methylindole

Igor O. Koshevoy,<sup>a\*</sup> Julia R. Shakirova,<sup>b</sup> Alexei S. Melnikov,<sup>c</sup> Matti Haukka,<sup>a</sup> Sergey P. Tunik<sup>b\*</sup>  
and Tapani A. Pakkanen<sup>a</sup>

<sup>a</sup> Department of Chemistry, University of Eastern Finland, Joensuu, 80101, Finland

<sup>b</sup> Department of Chemistry, St.-Petersburg State University, Universitetskii pr. 26, 198504, St.-Petersburg, Russia

<sup>c</sup> Department of Physics, St.-Petersburg State University, Universitetskii pr. 26, 198504, St.-Petersburg, Russia

E-mail: [igor.koshevoy@uef.fi](mailto:igor.koshevoy@uef.fi); [stunik@inbox.ru](mailto:stunik@inbox.ru)

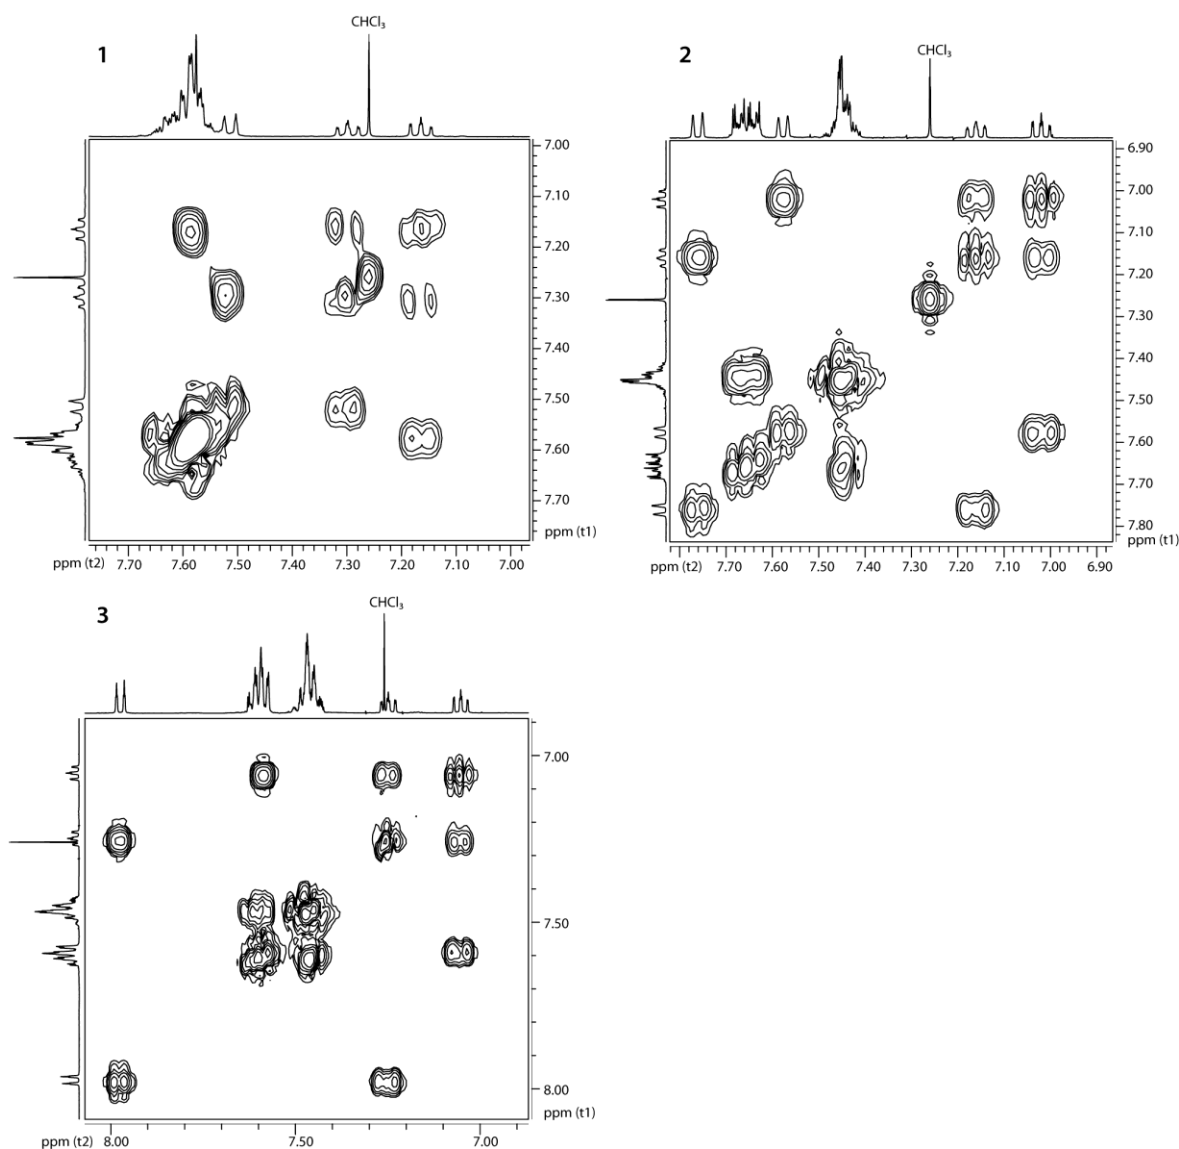

**Figure S1.**  $^1\text{H}$ - $^1\text{H}$  COSY NMR spectra of the complexes **1–3**,  $\text{CDCl}_3$ , 25 °C, 400 MHz.

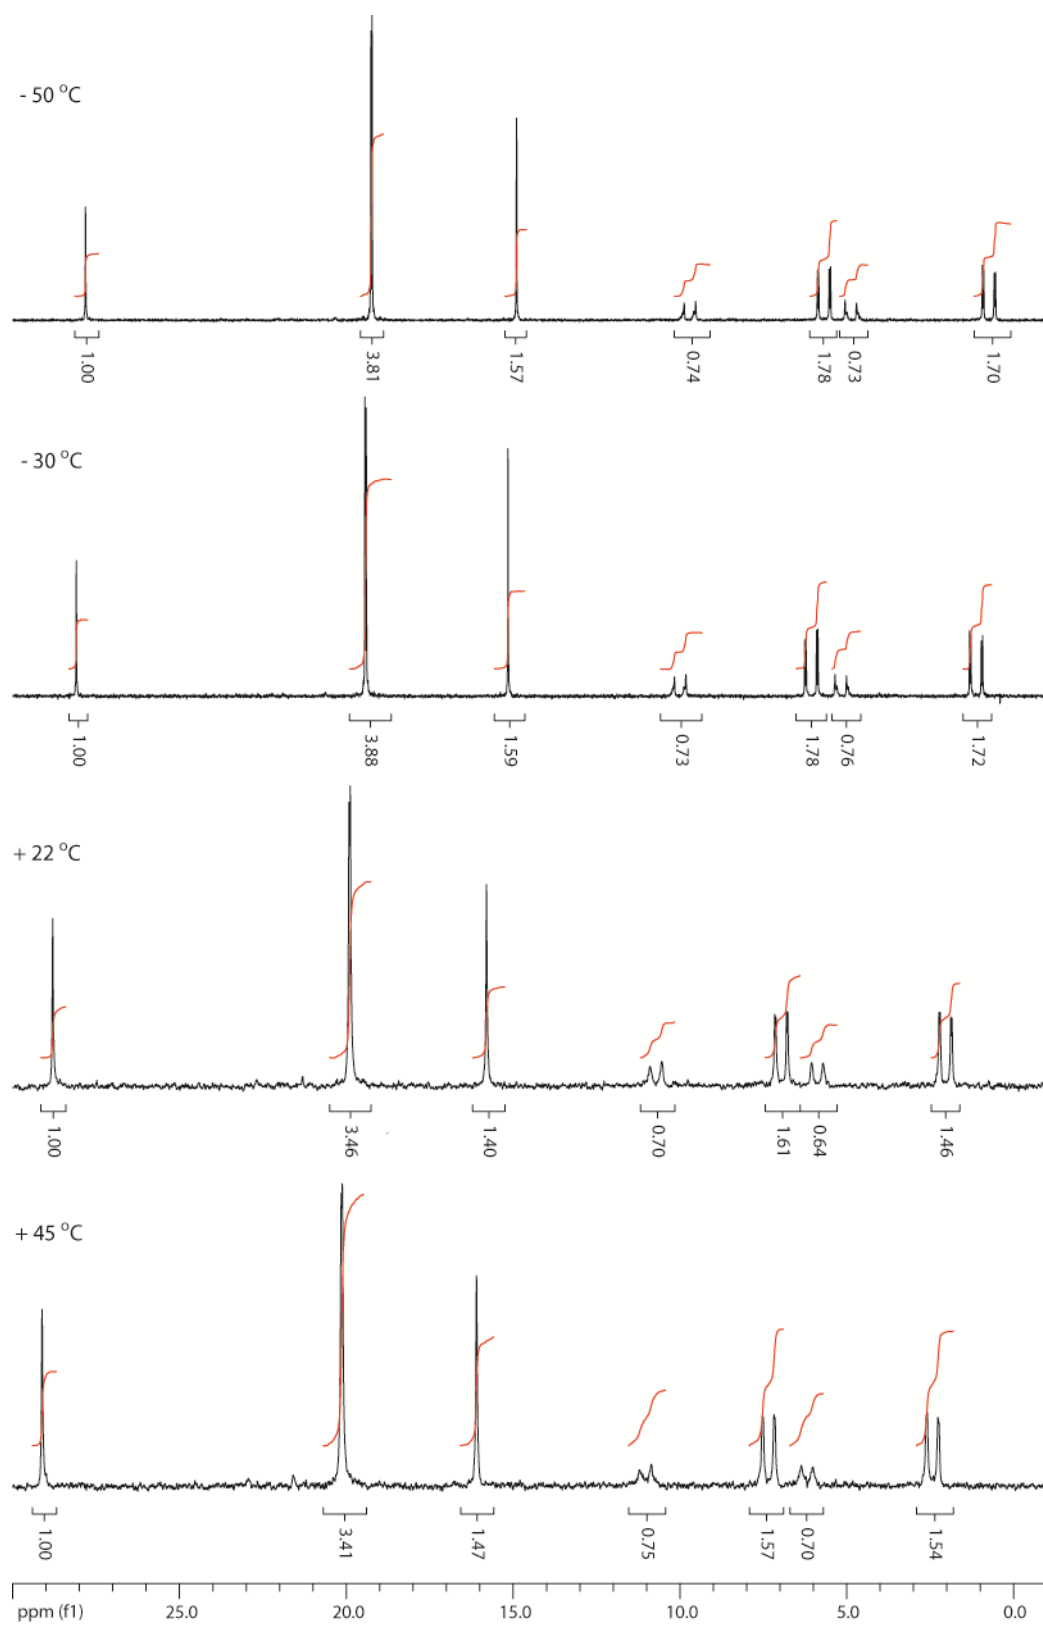

**Figure S2.** VT  $^{31}\text{P}\{^1\text{H}\}$  NMR spectra of the mixture **4**,  $\text{CDCl}_3$ , 300 MHz.

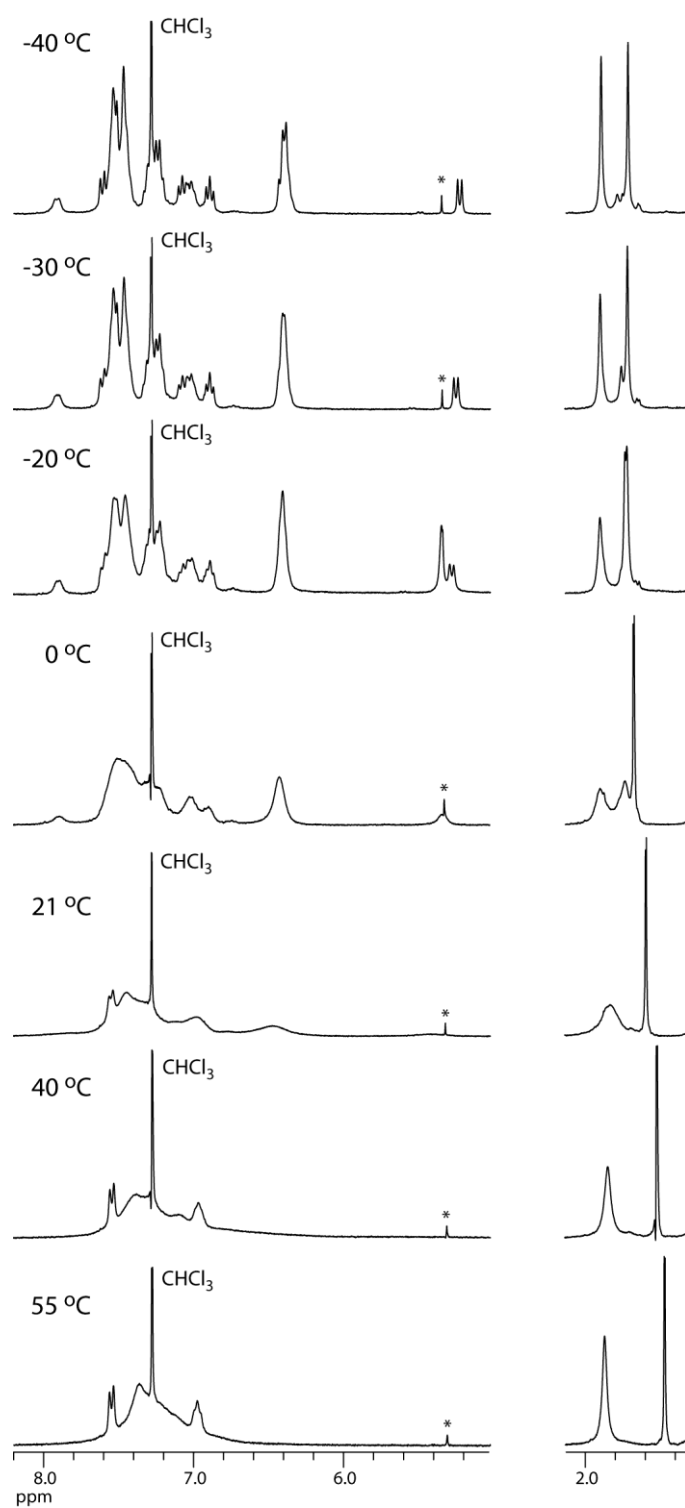

**Figure S3.** VT <sup>1</sup>H NMR spectra of the complex **6**, CDCl<sub>3</sub>, 300 MHz.

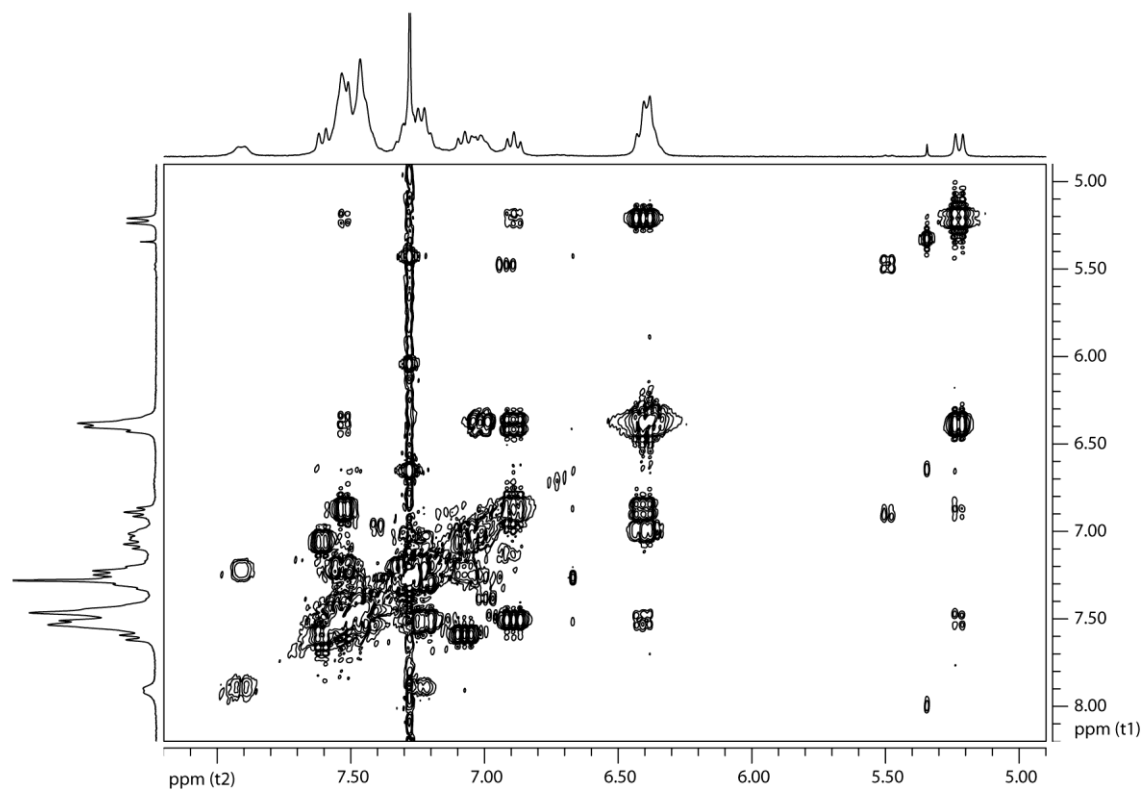

**Figure S4.**  $^1\text{H}$ - $^1\text{H}$  COSY NMR spectrum of the complex **6**,  $\text{CDCl}_3$ ,  $-40^\circ\text{C}$ , 300 MHz.

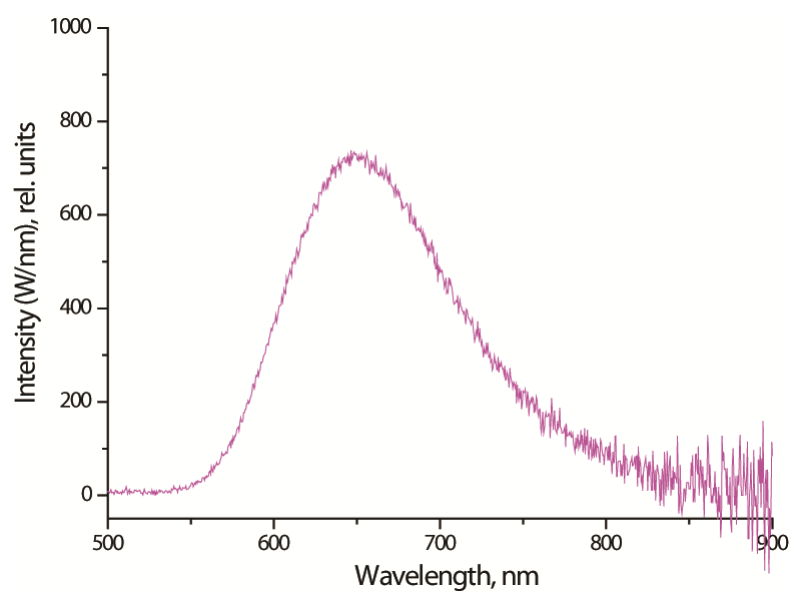

**Figure S5.** Solid-state emission spectrum of **6** at room temperature.
